# Supplementary material
Source: PubMed Central journal article supplement (PMC4269989)
Supplement: 40359_2014_26_MOESM1_ESM.pdf [file 40359_2014_26_MOESM1_ESM.pdf]

## ADDITIONAL FILE #1

### Search Strategy

Searches were conducted in PubMed, EMBASE and PsycINFO to identify relevant studies. The project proposal as well as suggestions from meetings of project co-investigators were used to source search terms. After initial searches were performed, the project team decided that an additional search should be conducted in PubMed for the supplementary concepts harm reduction, incentives, low threshold, contingency management and abstinence-only programs.

Search terms for all databases were grouped into several broad categories related to the interventions and factors affecting outcomes and combined with the terms for the concept of methadone maintenance. These categories included self-help, vocational support, housing, gender and age factors, formal interventions, community health support, volunteer or voluntary workers and wraparound services. A combination of subject/descriptor headings for each concept, exact phrase searching and keyword searching was used. No date restrictions were applied, however only articles in English were included. Details of the searches for all databases can be found below.

PubMed: Search 1 - (“Methadone”[Mesh] and maintenance OR “methadone maintenance” OR methadone maintenance) AND ((“Vocational Education”[Mesh]) OR “Rehabilitation, Vocational”[Mesh]) OR (“Vocational Guidance”[Mesh]) OR (“Self-Help Groups”[Mesh] OR self help groups OR self help OR “self help”) OR (“Housing”[Mesh] OR housing OR hous\*) OR (“Age Factors”[Mesh]) OR (“Sex Factors”[Mesh] ) OR (“formal intervention\*” OR formal intervention) OR (“Community Health Services”[Mesh]) OR (“Voluntary Workers”[Mesh]) OR (wraparound OR “wrap around” OR wrap around))

PubMed: Search 2 - (“Methadone”[Mesh] and maintenance OR “methadone maintenance” OR methadone maintenance) AND ((low threshold OR “low threshold”) OR (contingency management OR “contingency management”) OR (abstinence only OR “abstinence only?”) OR (“Harm Reduction”[Mesh] OR harm reduction OR “harm reduction”) OR (incentive\*))

EMBASE - (‘methadone treatment’/exp OR ‘methadone maintenance’/exp OR ‘methadone maintenance’) OR (‘methadone’/exp OR methadone AND ‘maintenance’/exp OR maintenance) AND ((‘vocational guidance’/exp OR ‘vocational education’/exp OR ‘vocational rehabilitation’/exp) OR (‘self help’/exp OR ‘self help’ OR ‘self help groups’/exp OR ‘self help groups’) OR (‘housing’/exp OR housing) OR (‘age factors’/exp OR ‘age factors’) OR (‘sex difference’/exp OR ‘gender bias’/exp OR ‘sex role’/exp) OR (formal AND intervention\* OR ‘formal intervention’) OR (‘community care’/exp OR ‘community health services’/exp OR ‘community health services’) OR (volunteer\* OR ‘volunteer’/exp OR ‘voluntary worker’/exp) OR (wraparound OR wrap AND around OR ‘wrap around’)

PsycINFO - DE “Methadone Maintenance” AND (DE “Vocational Counselors” OR DE “Vocational Education” OR DE “Vocational Evaluation” OR DE “Vocational Rehabilitation” OR DE “Occupational Guidance”) OR (DE “Self Help Techniques”) OR (DE “Housing”) OR (DE “Human Sex Differences”) OR (DE “Age Differences”) OR (DE “Community Mental

Health” OR DE “Community Mental Health Centers” OR DE “Community Mental Health Services” OR DE “Community Psychiatry” OR DE “Community Psychology” OR DE “Community Services” OR DE “Community Welfare Services”) OR (DE “Volunteers”)
